# Supplementary figures and images for: Automated Deep Lineage Tree Analysis Using a Bayesian Single Cell Tracking Approach
Source: Frontiers journal article supplement (doi:10.3389/fcomp.2021.734559), 2021-10-20

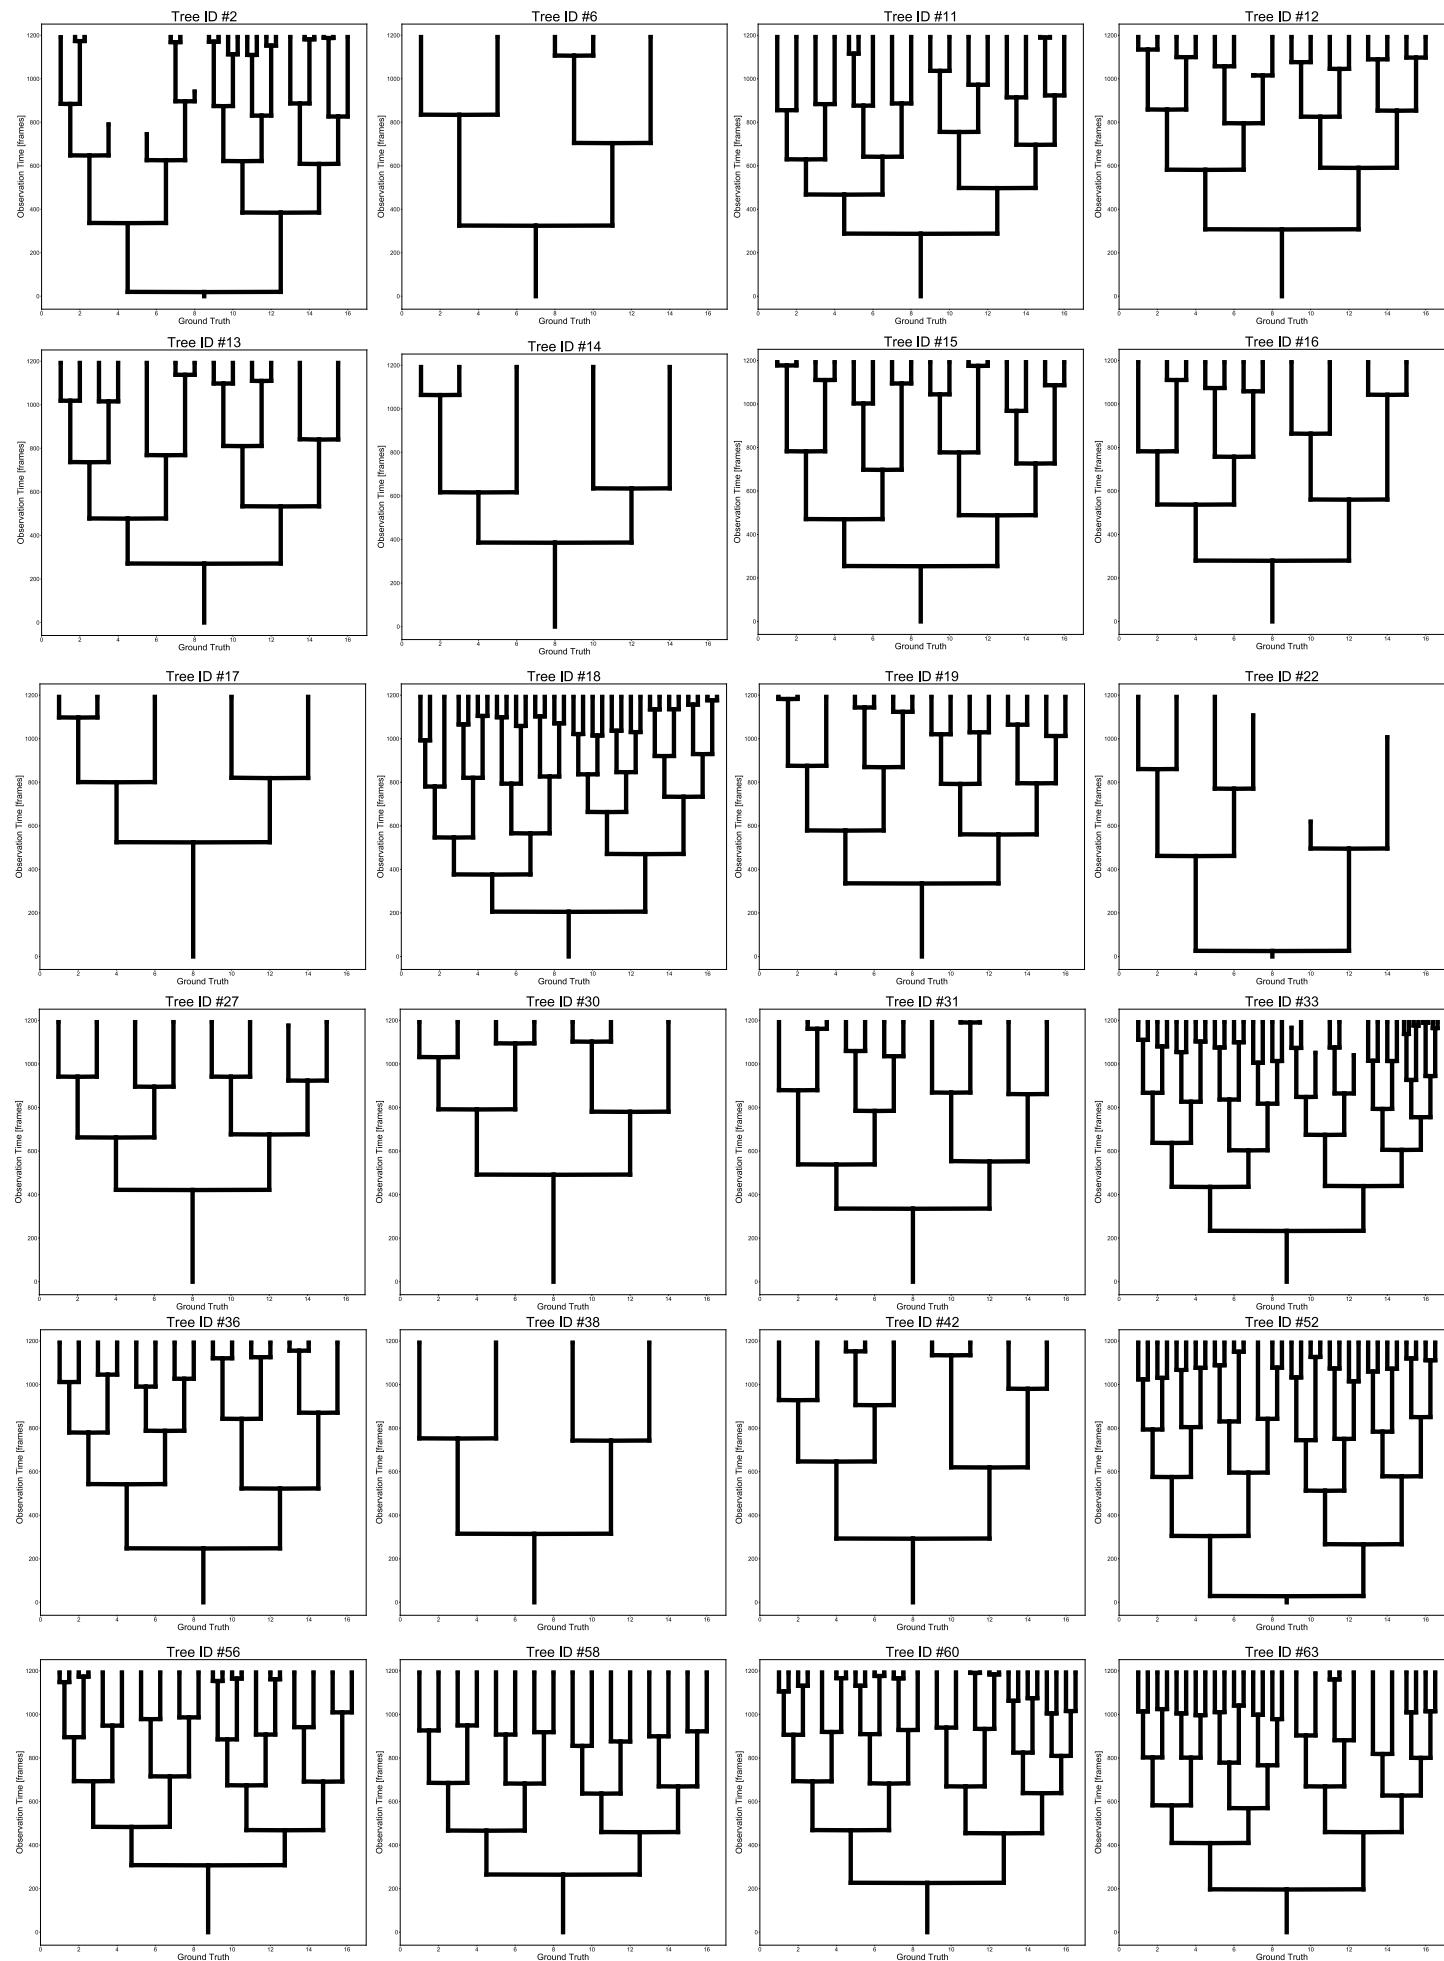

Supplement: Data_Sheet_1.zip [file Data_Sheet_1.zip]

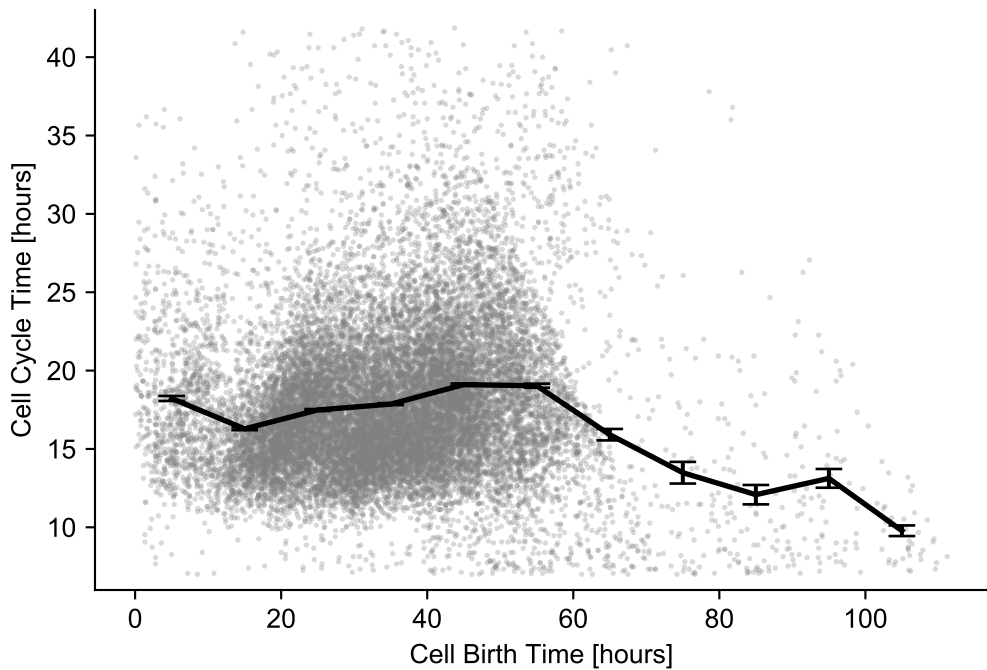

Supplement: Data_Sheet_1.zip [file Data_Sheet_1.zip]

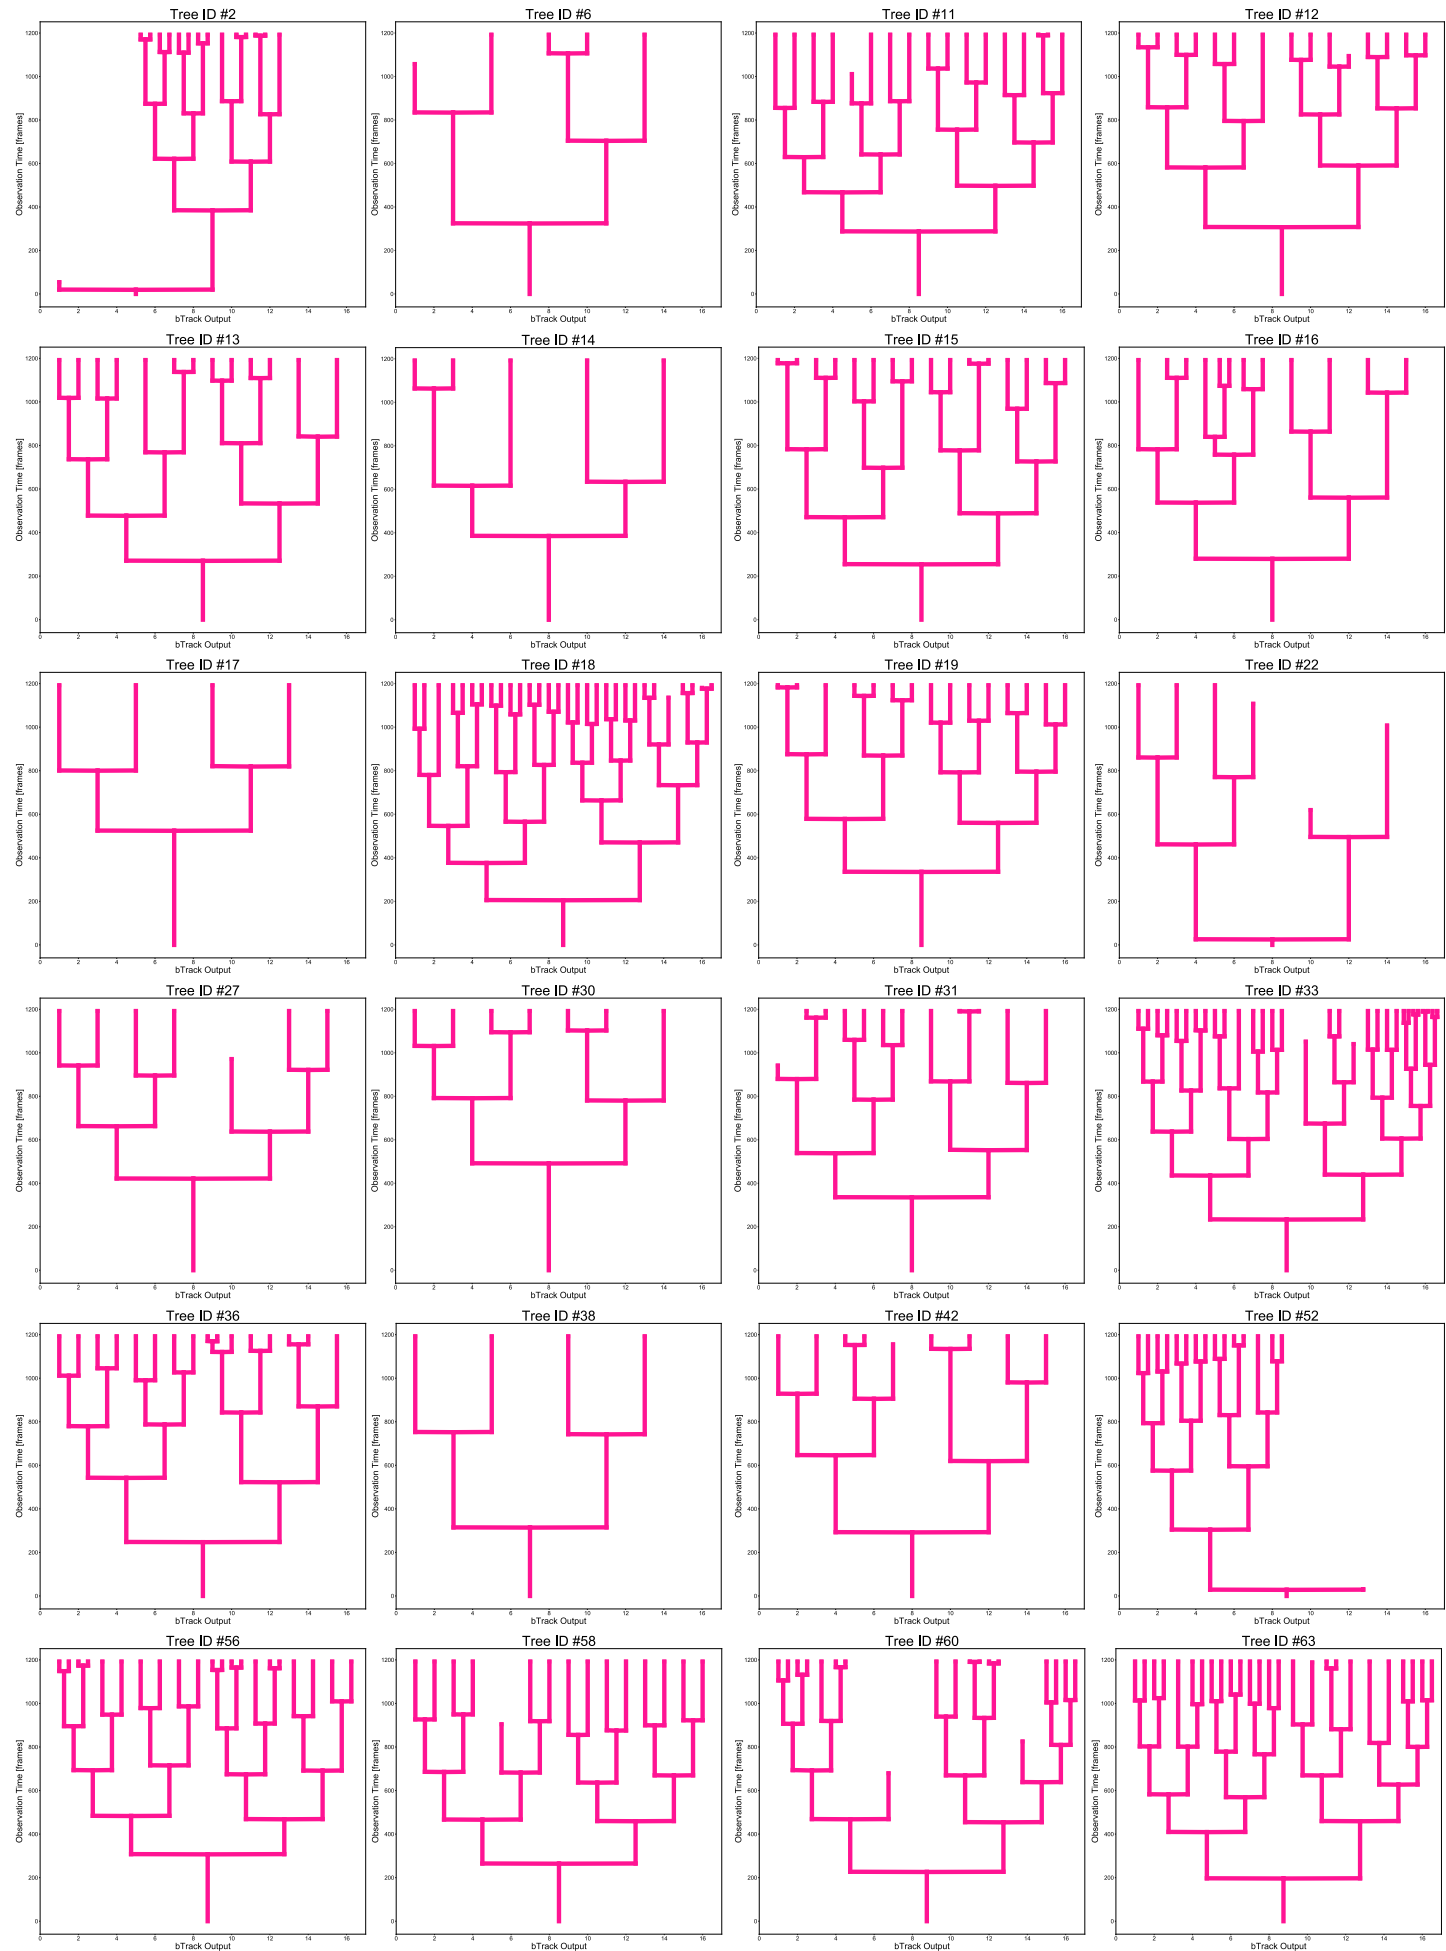

Supplement: Data_Sheet_1.zip [file Data_Sheet_1.zip]

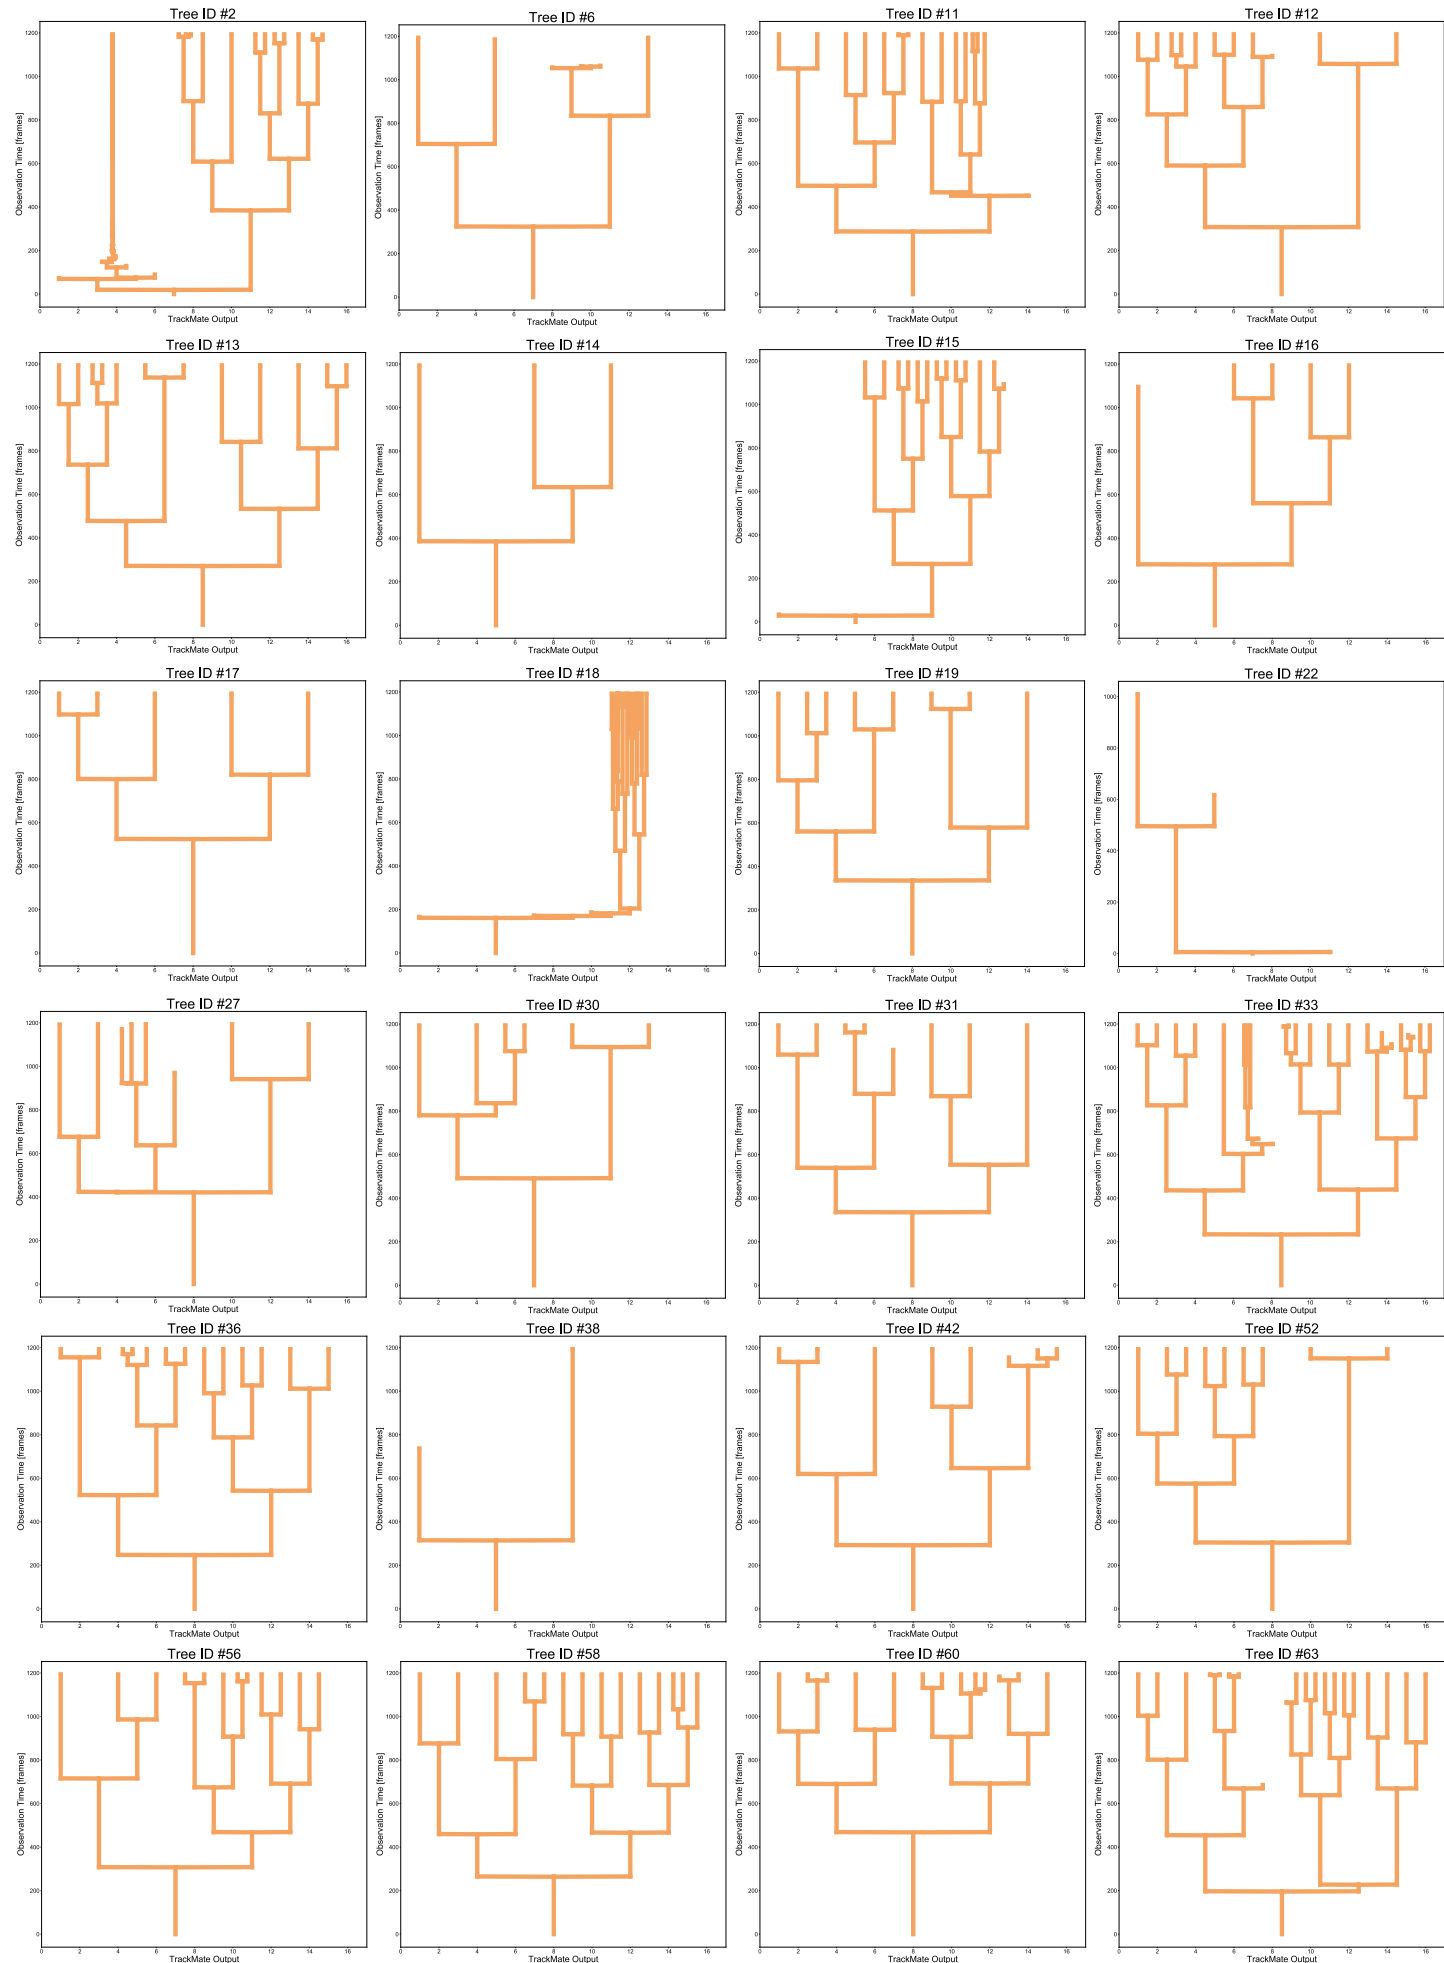

Supplement: Data_Sheet_1.zip [file Data_Sheet_1.zip]

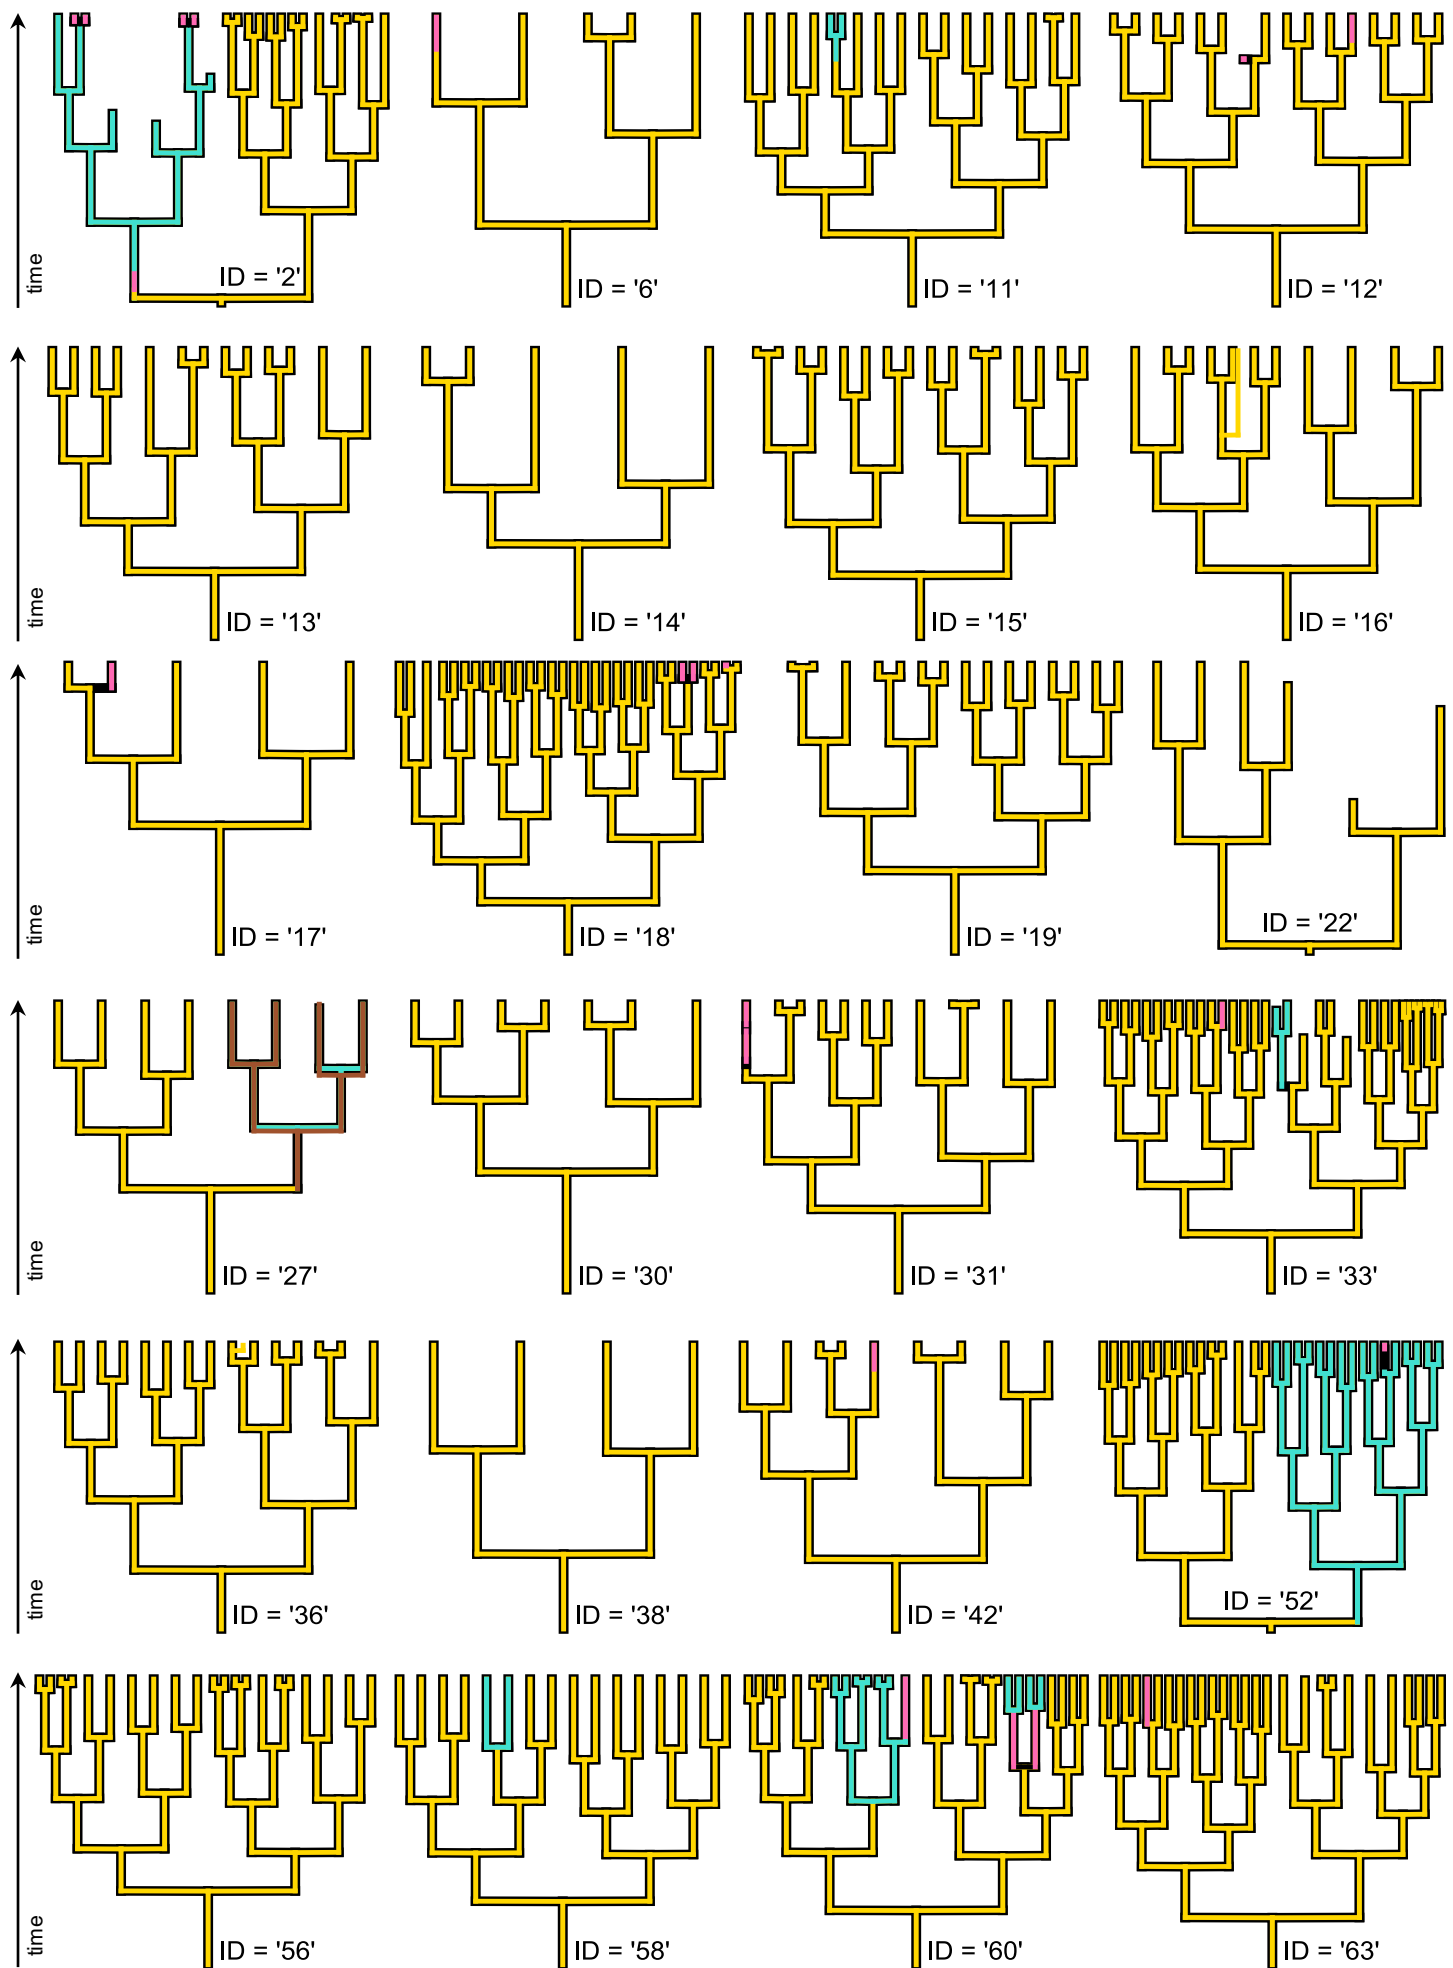

Supplement: Data_Sheet_1.zip [file Data_Sheet_1.zip]
